# Supplementary figures and images for: Phase II trial of the IDO pathway inhibitor indoximod plus pembrolizumab for the treatment of patients with advanced melanoma
Source: PubMed Central journal article supplement — J Immunother Cancer. 2021 Jun 11;9(6):e002057. doi: 10.1136/jitc-2020-002057 (PMC8202104; doi:10.1136/jitc-2020-002057), 2021-06-11

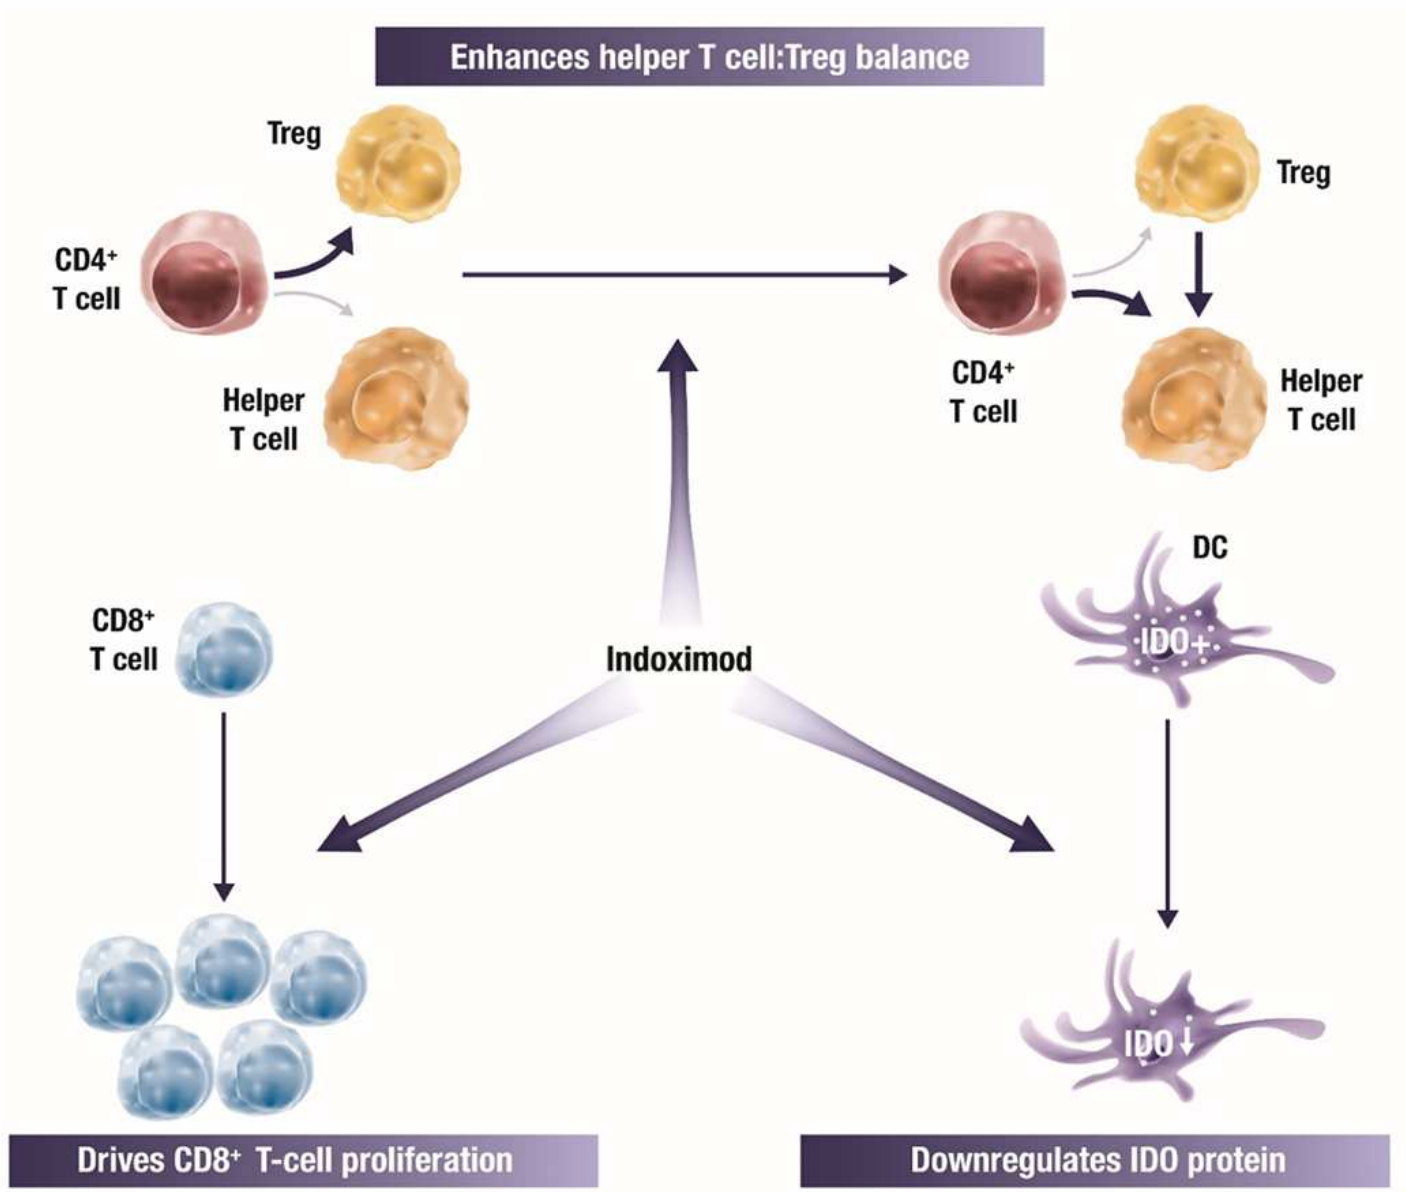

Supplement: jitc-2020-002057supp001.pdf [file jitc-2020-002057supp001.pdf]

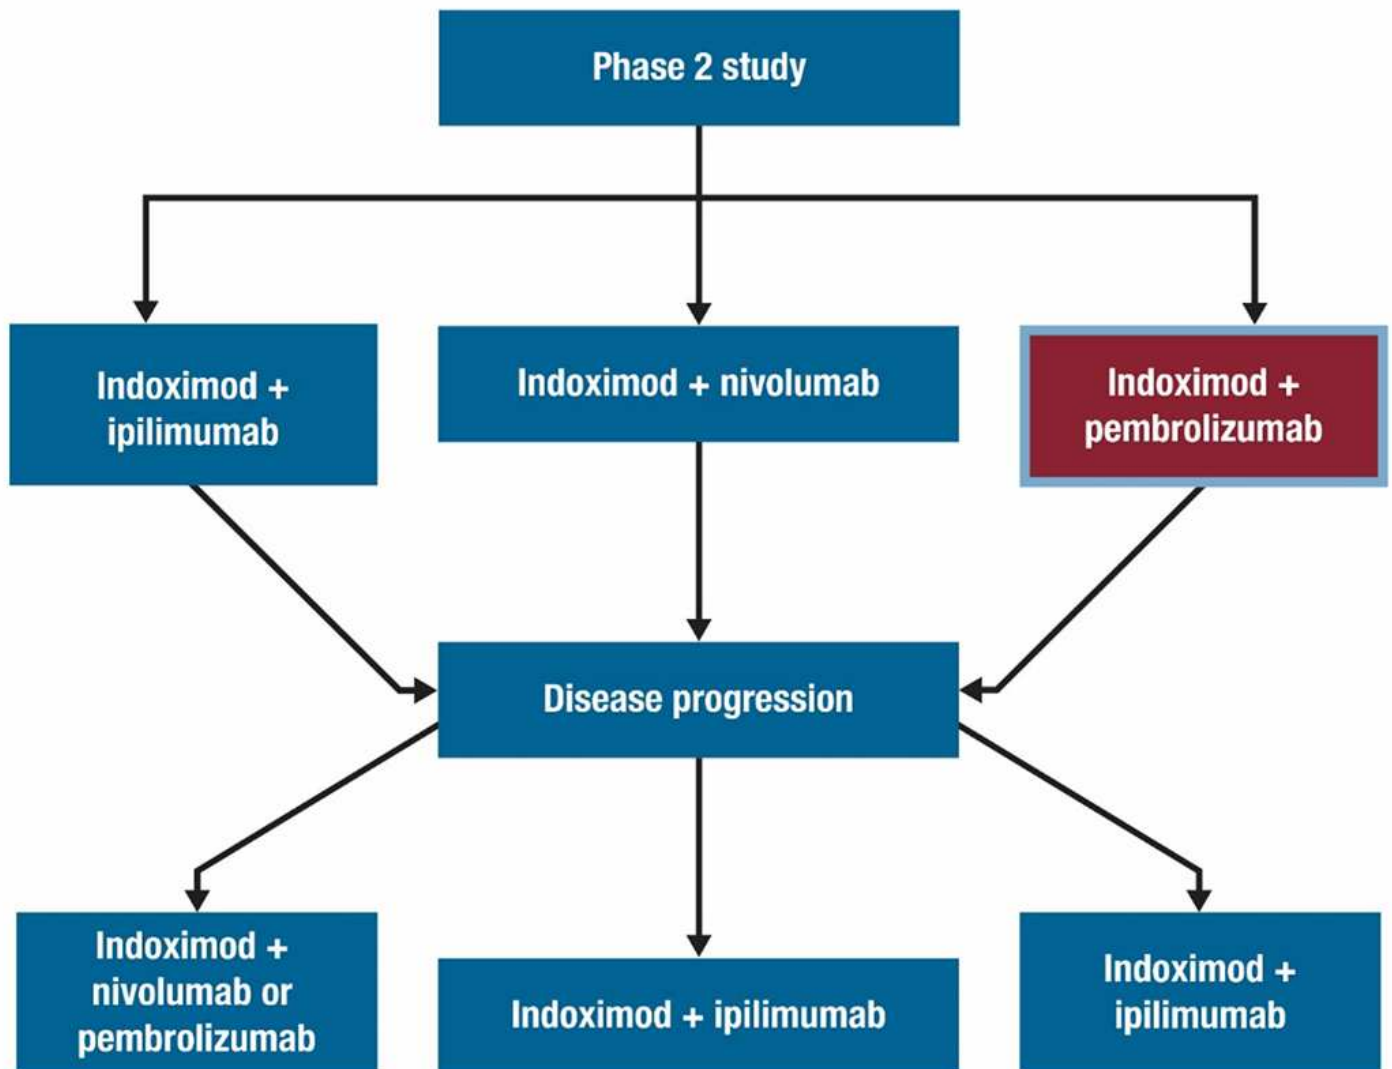

Supplement: jitc-2020-002057supp002.pdf [file jitc-2020-002057supp002.pdf]

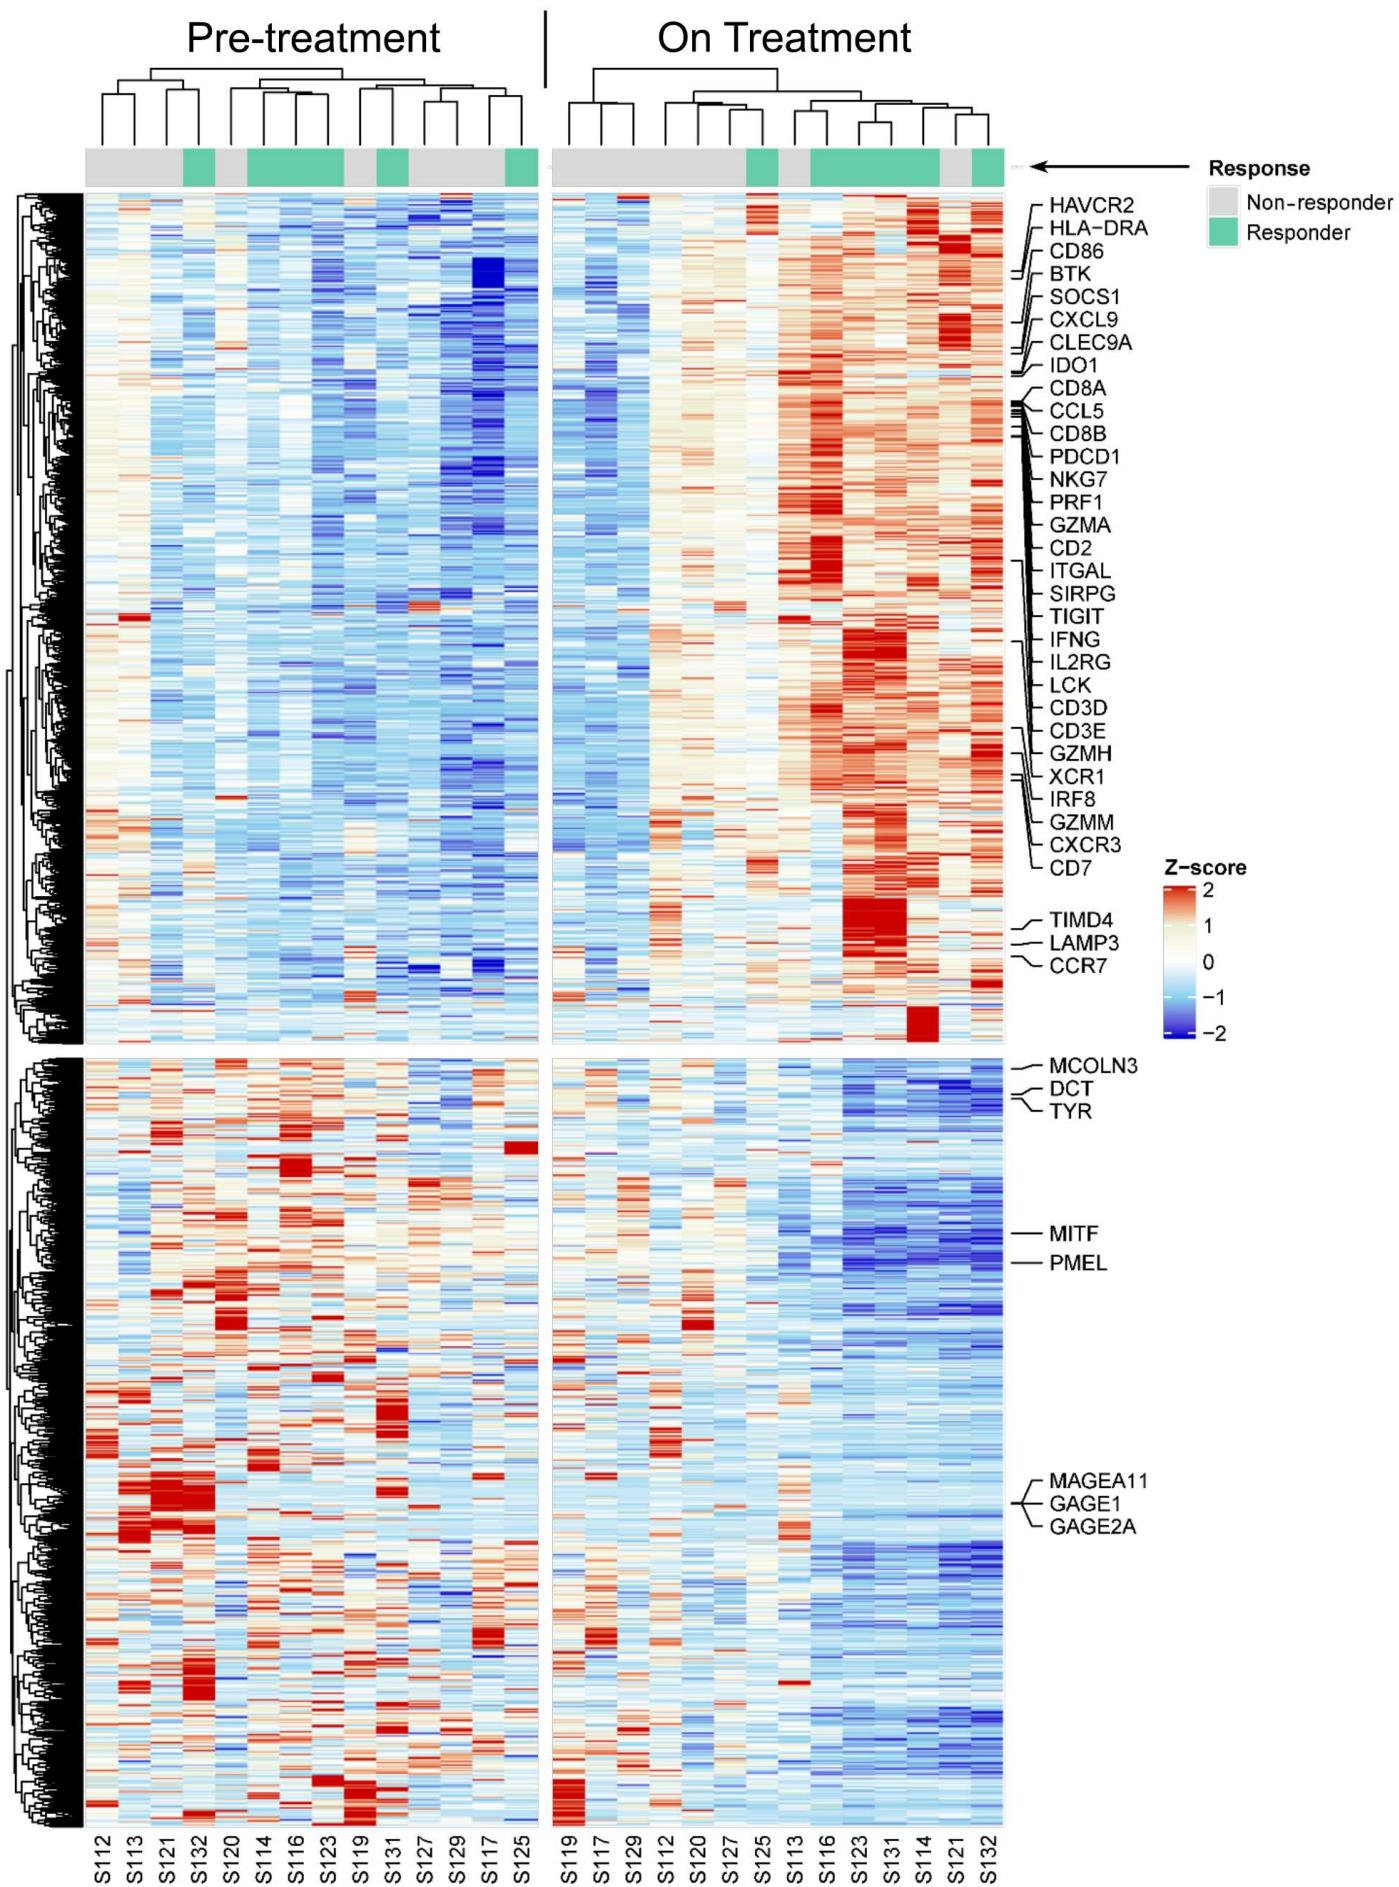

Supplement: jitc-2020-002057supp003.pdf [file jitc-2020-002057supp003.pdf]
